# Supplementary material for: Synthesis and acid catalysis of zeolite-templated microporous carbons with SO3H groups
Source: Royal Society of Chemistry journal article supplement (doi:10.1039/c3cp43853h), 2013-01-01
Supplement: c3cp43853h.pdf [file c3cp43853h.pdf]

## Supporting Information

# Synthesis and Acid Catalysis of Zeolite-Templated Microporous Carbons with SO<sub>3</sub>H Groups

Kiichi Fukuhara,<sup>a</sup> Kiyotaka Nakajima,<sup>a,b</sup> Masaaki Kitano,<sup>a</sup> Shigenobu Hayashi,<sup>c</sup> and Michikazu Hara<sup>a,\*</sup>

<sup>a</sup> *Materials and Structures Laboratory, Tokyo Institute of Technology, Nagatsuta-cho 4259-R3-33, Midori-ku, Yokohama 226-8503, Japan*

<sup>b</sup> *Japan Science and Technology agency, PRESTO, 4-1-8 Honcho, Kawaguchi 332-0012, Japan.*

<sup>c</sup> *Research Institute of Instrumentation Frontier, National Institute of Advanced Industrial Science and Technology (AIST), Central 5, 1-1-1 Higashi, Tsukuba, Ibaraki 305-8565, Japan.*

## Contents

1. Physicochemical properties of microporous carbon catalysts.
2. TG curves of carbon-zeolite composite materials.
3. Raman spectra of SO<sub>3</sub>H-bearing microporous catalysts

## Figure captions

**Figure S1.** TG curves of (a)MC(Imp) and (b)MC(Imp-CVD) before HF treatment.

**Figure S2.** Raman spectra of (a)SO<sub>3</sub>H-MC(Imp) and (b)SO<sub>3</sub>H-MC(Imp-CVD).

## 1. Physicochemical properties of microporous carbon catalysts.

Table S1. Physicochemical properties of microporous carbon catalysts.

|                                          | $S_{\text{BET}}$<br>/ $\text{m}^2 \text{g}^{-1}$ | Micropore volume<br>/ $\text{cm}^3 \text{g}^{-1}$ | Carbon fraction <sup>*1</sup><br>/ $\text{g g}^{-1}_{\text{zeolite}}$ | H/C  |
|------------------------------------------|--------------------------------------------------|---------------------------------------------------|-----------------------------------------------------------------------|------|
| $\text{SO}_3\text{H-MC}(\text{Imp})$     | 890<br>(1300) <sup>*2</sup>                      | 0.36                                              | 0.24                                                                  | 0.55 |
| $\text{SO}_3\text{H-MC}(\text{Imp-CVD})$ | 1150<br>(1900) <sup>*2</sup>                     | 0.61                                              | 0.75                                                                  | 0.21 |
| CCSA                                     | <5<br>(<5) <sup>*2</sup>                         | -                                                 | -                                                                     | 0.96 |

\*1 Carbon fraction in each zeolite/carbon composite was calculated from TG-DTA profiles.

\*2 Values in parentheses are BET surface areas of the sample before sulfonation.

## 2. TG curves of carbon-zeolite composite materials.

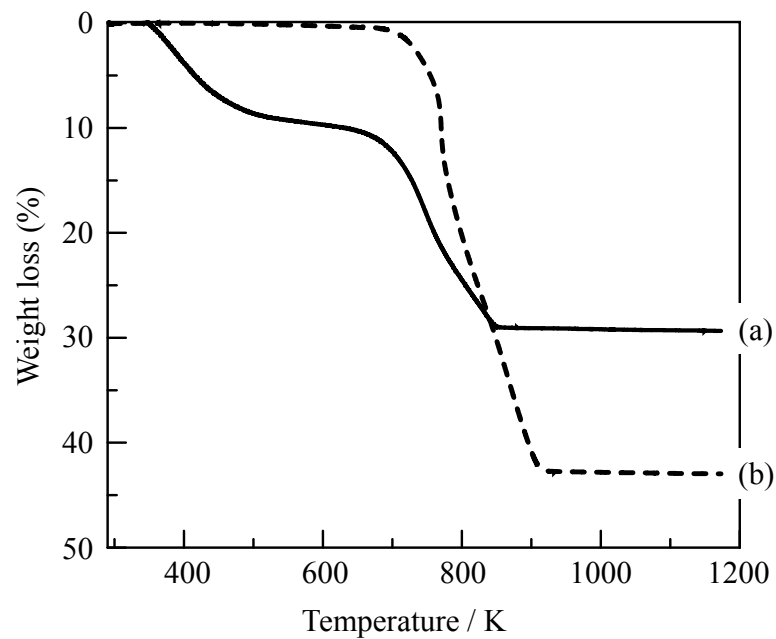

Figure S1. TG curves of (a) MC(Imp) and (b) MC(Imp-CVD) before HF treatment.

## 2. Raman spectra of SO<sub>3</sub>H-bearing microporous catalysts

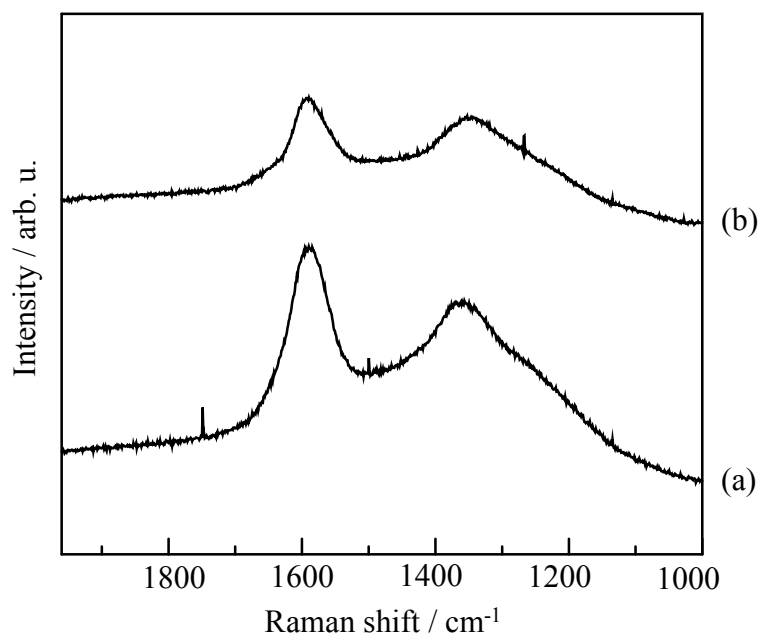

**Figure S2.** Raman spectra of (a) SO<sub>3</sub>H-MC(Imp) and (b) SO<sub>3</sub>H-MC(Imp-CVD).

Figure S2 shows Raman spectra of SO<sub>3</sub>H-MC(Imp) and SO<sub>3</sub>H-MC(Imp-CVD). Two distinct signals, assignable to the D (1350 cm<sup>-1</sup>, A<sub>1g</sub> D breathing mode) and G bands (1580 cm<sup>-1</sup>, E<sub>2g</sub> G mode), are evident. These signals are typical of amorphous carbon with small graphene sheets.
